# Supplementary material
Source: Copernicus journal article supplement (doi:10.5194/egusphere-2026-2023)
Supplement: Supplementary file 1 [file egusphere-2026-2023-supplement.pdf]

1

## Supplementary Materials

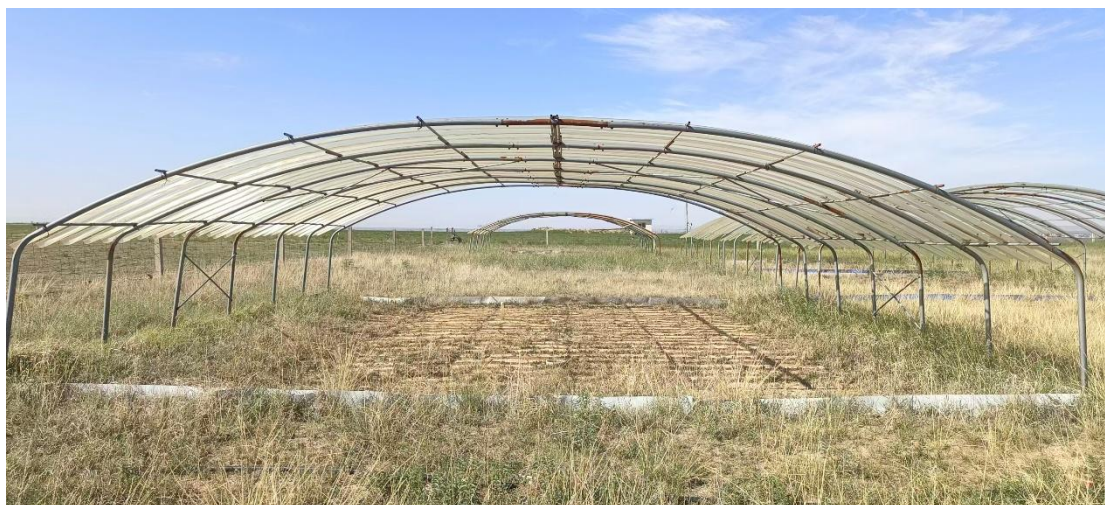

2

3 **Figure S1: The experimental site of the study.**

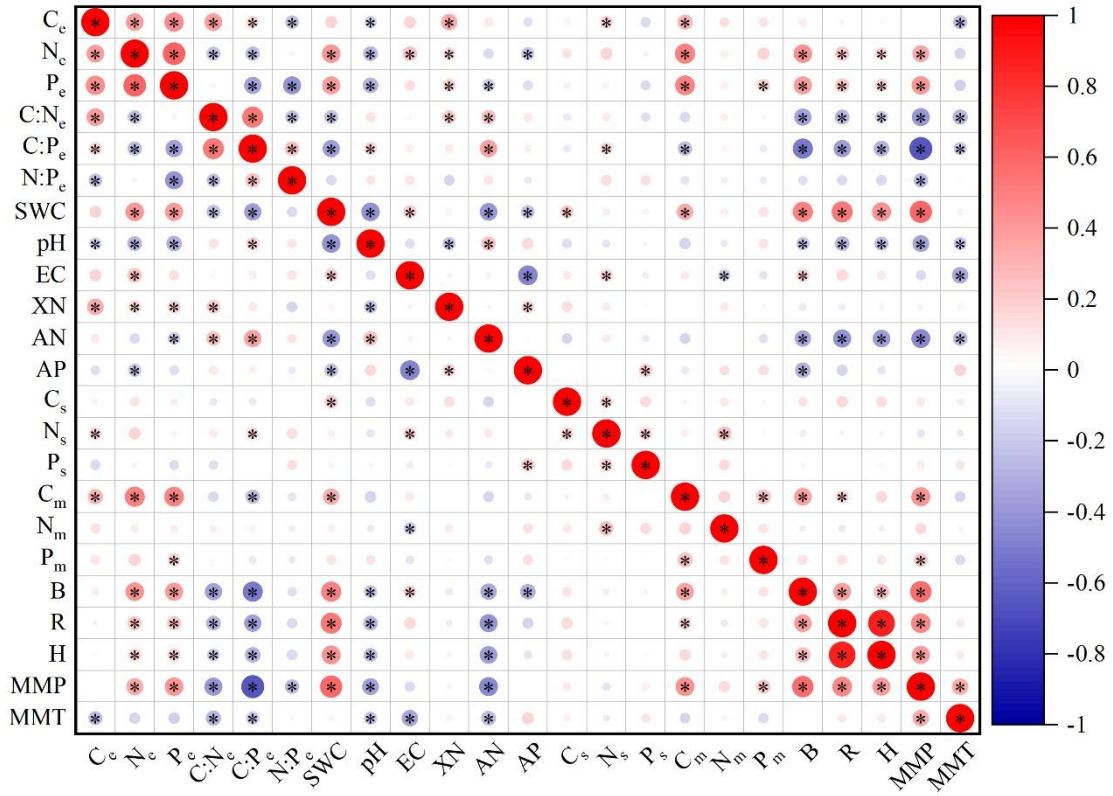

4

5 **Figure S2: Relationship between soil enzyme C:N:P ecological stoichiometry with environmental factors. \*P**  
 6 **< 0.05, \*\*P < 0.01, \*\*\*P < 0.001. See abbreviations in Table 1.**

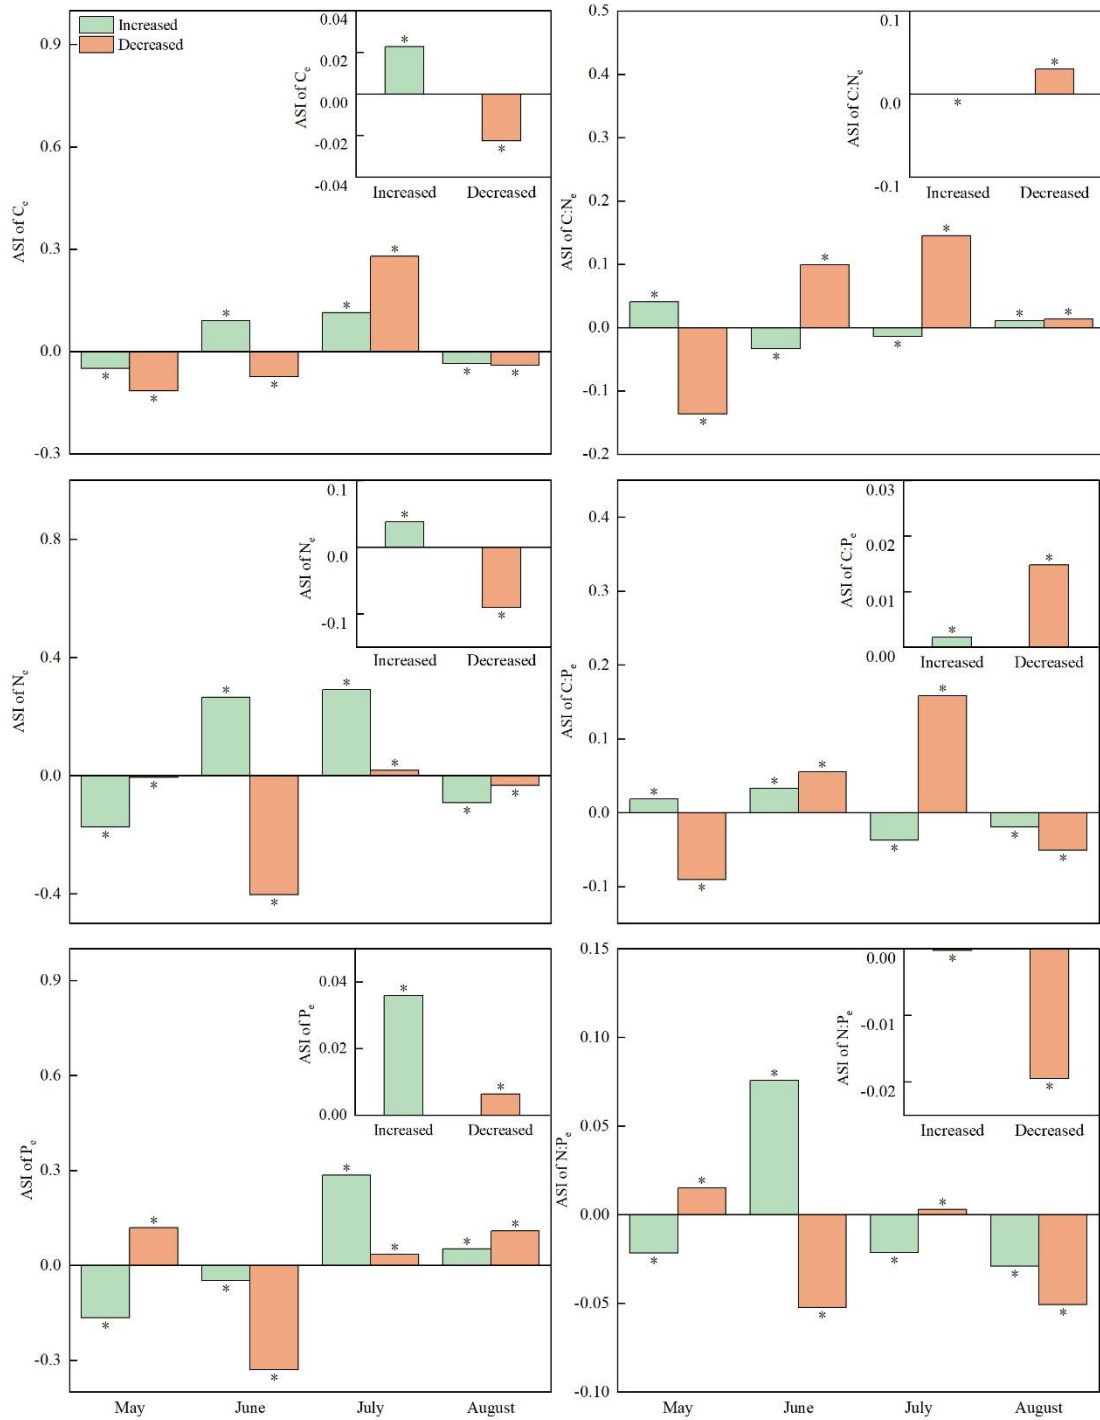

7

8 **Figure S3: Asymmetry index (ASI) of soil enzyme C:N:P ecological stoichiometry under increased and**  
 9 **decreased precipitation treatments. Error bars indicate 95% confidence intervals and asterisks suggest**  
 10 **significant asymmetries under the condition that the 95% confidence intervals did not override zero. The**  
 11 **positive ASI values indicate that soil enzymes responded more strongly to the extreme precipitation changes**  
 12 **than to the moderate precipitation changes, and vice versa.**
